# Supplementary material
Source: ML conference proceedings conference paper supplement (https://openreview.net/forum?id=kndxjyKxX2)
Supplement: supplementary_material [file attachment]

756 A APPENDIX

757 A.1 PROOF OF THEOREM 1

758 *Proof.* Since cutting planes are generated and added to the polytope every  $k$  iteration, the polytope  
759  $\mathcal{P}$  satisfies that  $\mathcal{P}^0 \supseteq \mathcal{P}^k \supseteq \dots \mathcal{P}^{nk}$ . Known that the feasible region of the problem in Eq.(5) is  
760  $\mathcal{Z}$ , we denote the feasible region of Eq.(7) in  $k^{th}$  iteration as  $\mathcal{Z}'^k$ . Then we have  $\mathcal{Z}'^0 \supseteq \mathcal{Z}'^k \supseteq$   
761  $\dots \mathcal{Z}'^{nk} \supseteq \mathcal{Z}$ . Denoting the optimal value of the objective function in Eq.(7) at  $k^{th}$  iteration as  
762  $F(\mathbf{x}^{k*}, \mathbf{y}^{k*})$ , we can obtain that:

763 
$$F(\mathbf{x}^{0*}, \mathbf{y}^{0*}) \leq F(\mathbf{x}^{k*}, \mathbf{y}^{k*}) \leq \dots \leq F(\mathbf{x}^{n*}, \mathbf{y}^{n*}). \quad (18)$$

764 Subsequently, we have that

765 
$$\frac{F^*}{F(\mathbf{x}^{0*}, \mathbf{y}^{0*})} \geq \frac{F^*}{F(\mathbf{x}^{k*}, \mathbf{y}^{k*})} \geq \dots \geq \frac{F^*}{F(\mathbf{x}^{nk*}, \mathbf{y}^{nk*})} \geq \alpha, \quad (19)$$

766 where  $F^*$  denotes the optimal objective value of the problem in Eq.(5),  $\alpha \geq 1$ . It can be observed  
767 that  $\frac{F^*}{F(\mathbf{x}^{k*}, \mathbf{y}^{k*})}$  is a monotonically nonincreasing sequence. Therefore, when  $nk \rightarrow \infty$ , the optimal  
768 objective value of the problem in Eq.(7) will converge to  $\alpha$  monotonically.

769 According to Eq.(12), in the  $\epsilon \rightarrow 0$  limit, we have

770 
$$\hat{\nabla}_{\mathbf{x}} L_p(\mathbf{x}, \mathbf{y}, \{\lambda_l\}; \mathcal{B}) = \frac{1}{Bd} \sum_{\xi \in \mathcal{B}} \sum_{i \in [d]} \mathbf{z}_i \mathbf{z}_i^\top \nabla_{\mathbf{x}} L_p(\mathbf{x}, \mathbf{y}, \{\lambda_l\}; \xi), \quad (20)$$

771 and  $\mathbb{E}[\hat{\nabla}_{\mathbf{x}} L_p(\mathbf{x}, \mathbf{y}, \{\lambda_l\}; \mathcal{B})] = \nabla_{\mathbf{x}} L_p(\mathbf{x}, \mathbf{y}, \{\lambda_l\})$ . That is,  $\hat{\nabla}_{\mathbf{x}} L_p(\mathbf{x}, \mathbf{y}, \{\lambda_l\}; \mathcal{B})$  is an unbiased  
772 estimator of the gradient.

773 The second moment can be computed as

774 
$$\begin{aligned} & \mathbb{E}[\hat{\nabla}_{\mathbf{x}} L_p(\mathbf{x}, \mathbf{y}, \{\lambda_l\}; \mathcal{B}) \hat{\nabla}_{\mathbf{x}} L_p(\mathbf{x}, \mathbf{y}, \{\lambda_l\}; \mathcal{B})^\top] \\ &= \frac{1}{B^2 d^2} \sum_{\xi_1, \xi_2 \in \mathcal{B}} \sum_{i, j \in [d]} \mathbb{E}[(\mathbf{z}_i \mathbf{z}_i^\top \nabla_{\mathbf{x}} L_p(\mathbf{x}, \mathbf{y}, \{\lambda_l\}; \xi_1)) (\mathbf{z}_j \mathbf{z}_j^\top \nabla_{\mathbf{x}} L_p(\mathbf{x}, \mathbf{y}, \{\lambda_l\}; \xi_2))^\top]. \end{aligned} \quad (21)$$

775 Given two arbitrary vectors  $\mathbf{u}$  and  $\mathbf{v}$ , we can obtain

776 
$$\mathbb{E}_{\mathbf{z}_i, \mathbf{z}_j} [\mathbf{z}_i \mathbf{z}_i^\top \mathbf{u} \mathbf{v}^\top \mathbf{z}_j \mathbf{z}_j^\top] = \mathbf{u} \mathbf{v}^\top, i \neq j, \quad (22)$$

777 and

778 
$$\mathbb{E}_{\mathbf{z}_i} [\mathbf{z}_i \mathbf{z}_i^\top \mathbf{u} \mathbf{v}^\top \mathbf{z}_i \mathbf{z}_i^\top] = \mathbb{E}_{\mathbf{z}} [\mathbf{z}^{\otimes 4}] (\mathbf{u}, \mathbf{v}) = \frac{3n}{n+2} \text{Sym}(\mathbf{I}^{\otimes 2}) (\mathbf{u}, \mathbf{v}) = \frac{n}{n+2} \mathbf{u}^\top \mathbf{v} \mathbf{I} + \frac{2n}{n+2} \mathbf{u} \mathbf{v}^\top. \quad (23)$$

779 It follows that

780 
$$\begin{aligned} & \mathbb{E}[\hat{\nabla}_{\mathbf{x}} L_p(\mathbf{x}, \mathbf{y}, \{\lambda_l\}; \mathcal{B}) \hat{\nabla}_{\mathbf{x}} L_p(\mathbf{x}, \mathbf{y}, \{\lambda_l\}; \mathcal{B})^\top] \\ &= \frac{1}{B^2} \sum_{\xi_1, \xi_2 \in \mathcal{B}} \left( \frac{d-1}{d} + \frac{2n}{d(n+2)} \right) \mathbb{E}[L_p(\mathbf{x}, \mathbf{y}, \{\lambda_l\}; \xi_1) L_p(\mathbf{x}, \mathbf{y}, \{\lambda_l\}; \xi_2)^\top] \\ &+ \frac{n}{d(n+1)} \mathbb{E}[L_p(\mathbf{x}, \mathbf{y}, \{\lambda_l\}; \xi_1)^\top L_p(\mathbf{x}, \mathbf{y}, \{\lambda_l\}; \xi_2)] \mathbf{I} \\ &= \left(1 + \frac{n-2}{d(n+2)}\right) (\nabla_{\mathbf{x}} L_p(\mathbf{x}, \mathbf{y}, \{\lambda_l\}) \nabla_{\mathbf{x}} L_p(\mathbf{x}, \mathbf{y}, \{\lambda_l\})^\top) + \frac{1}{B} \boldsymbol{\Sigma}_{\mathbf{x}}(\mathbf{x}, \mathbf{y}, \{\lambda_l\}) \\ &+ \frac{n}{d(n+2)} \mathbf{I} (\|\nabla_{\mathbf{x}} L_p(\mathbf{x}, \mathbf{y}, \{\lambda_l\})\|^2 + \frac{1}{B} \text{tr}(\boldsymbol{\Sigma}_{\mathbf{x}}(\mathbf{x}, \mathbf{y}, \{\lambda_l\}))). \end{aligned} \quad (24)$$

801 According to Eq.(24), we can obtain that

802 
$$\mathbb{E}[\|\hat{\nabla}_{\mathbf{x}} L_p(\mathbf{x}, \mathbf{y}, \{\lambda_l\}; \mathcal{B})\|^2] = \frac{n+d-1}{d} \mathbb{E}[\nabla_{\mathbf{x}} L_p(\mathbf{x}, \mathbf{y}, \{\lambda_l\}; \mathcal{B})]. \quad (25)$$

By Taylor's theorem with remainder, we have

$$\begin{aligned}
& L_p(\mathbf{x}^{t+1}, \mathbf{y}^t, \{\lambda_i^t\}) \\
&= L_p(\mathbf{x}^t, \mathbf{y}^t, \{\lambda_i^t\}) + \nabla_{\mathbf{x}} L_p(\mathbf{x}^t, \mathbf{y}^t, \{\lambda_i^t\})^\top (\mathbf{x}^{t+1} - \mathbf{x}^t) \\
&+ \int_0^1 \beta (\mathbf{x}^{t+1} - \mathbf{x}^t)^\top \nabla_{\mathbf{x}}^2 L_p(\beta \mathbf{x}^{t+1} + (1 - \beta) \mathbf{x}^t, \mathbf{y}^t, \{\lambda_i^t\}) (\mathbf{x}^{t+1} - \mathbf{x}^t)^\top d\beta.
\end{aligned} \tag{26}$$

According to the update rules of  $\mathbf{x}$  and properties of  $\{\mathbf{z}\}$ , we have

$$\begin{aligned}
\|\mathbf{x}^{t+1} - \mathbf{x}^t\| &= \eta \|\hat{\nabla}_{\mathbf{x}} L_p(\mathbf{x}^t, \mathbf{y}^t, \{\lambda_i^t\}; \mathcal{B})\| \\
&\leq \frac{\eta \sqrt{n}}{Bd} \sum |\mathbf{z}_i^\top \nabla_{\mathbf{x}} L_p(\mathbf{x}^t, \mathbf{y}^t, \{\lambda_i^t\}; \xi)| \\
&\leq \eta n G(\mathbf{x}^t, \mathbf{y}^t, \{\lambda_i^t\}).
\end{aligned} \tag{27}$$

According to assumptions on smoothness and r-effective rank of the  $L_p$  function and Eq.(27), we can obtain that

$$\begin{aligned}
& L_p(\mathbf{x}^{t+1}, \mathbf{y}^t, \{\lambda_i^t\}) \\
&\leq L_p(\mathbf{x}^t, \mathbf{y}^t, \{\lambda_i^t\}) + \nabla_{\mathbf{x}} L_p(\mathbf{x}^t, \mathbf{y}^t, \{\lambda_i^t\})^\top (\mathbf{x}^{t+1} - \mathbf{x}^t) + (\mathbf{x}^{t+1} - \mathbf{x}^t)^\top \mathbf{H}_{\mathbf{x}}(\mathbf{x}^t, \mathbf{y}^t, \{\lambda_i^t\}) (\mathbf{x}^{t+1} - \mathbf{x}^t) \\
&= L_p(\mathbf{x}^t, \mathbf{y}^t, \{\lambda_i^t\}) - \eta \nabla_{\mathbf{x}} L_p(\mathbf{x}^t, \mathbf{y}^t, \{\lambda_i^t\})^\top \hat{\nabla}_{\mathbf{x}} L_p(\mathbf{x}^t, \mathbf{y}^t, \{\lambda_i^t\}; \mathcal{B}) \\
&+ \frac{1}{2} \eta^2 \hat{\nabla}_{\mathbf{x}} L_p(\mathbf{x}^t, \mathbf{y}^t, \{\lambda_i^t\}; \mathcal{B})^\top \mathbf{H}_{\mathbf{x}}(\mathbf{x}^t, \mathbf{y}^t, \{\lambda_i^t\}) \hat{\nabla}_{\mathbf{x}} L_p(\mathbf{x}^t, \mathbf{y}^t, \{\lambda_i^t\}; \mathcal{B}).
\end{aligned} \tag{28}$$

Plugging Eq.(24) into Eq.(28) and taking the expectation to have

$$\begin{aligned}
& \mathbb{E}[L_p(\mathbf{x}^{t+1}, \mathbf{y}^t, \{\lambda_i^t\})] \\
&\leq L_p(\mathbf{x}^t, \mathbf{y}^t, \{\lambda_i^t\}) - \eta \|\nabla_{\mathbf{x}} L_p(\mathbf{x}^t, \mathbf{y}^t, \{\lambda_i^t\})\|^2 \\
&+ \frac{\eta^2}{2} \langle \mathbf{H}_{\mathbf{x}}(\mathbf{x}^t, \mathbf{y}^t, \{\lambda_i^t\}), \mathbb{E}[\hat{\nabla}_{\mathbf{x}} L_p(\mathbf{x}^t, \mathbf{y}^t, \{\lambda_i^t\}; \mathcal{B}) \hat{\nabla}_{\mathbf{x}} L_p(\mathbf{x}^t, \mathbf{y}^t, \{\lambda_i^t\}; \mathcal{B})^\top] \rangle \\
&= L_p(\mathbf{x}^t, \mathbf{y}^t, \{\lambda_i^t\}) - \eta \|\nabla_{\mathbf{x}} L_p(\mathbf{x}^t, \mathbf{y}^t, \{\lambda_i^t\})\|^2 \\
&+ \frac{\eta^2}{2} \cdot \frac{n}{d(n+2)} (\|\nabla_{\mathbf{x}} L_p(\mathbf{x}^t, \mathbf{y}^t, \{\lambda_i^t\})\|^2 + \frac{1}{B} \text{tr}(\Sigma_{\mathbf{x}}(\mathbf{x}^t, \mathbf{y}^t, \{\lambda_i^t\}))) \text{tr}(\mathbf{H}_{\mathbf{x}}(\mathbf{x}^t, \mathbf{y}^t, \{\lambda_i^t\})) \\
&+ \frac{\eta^2}{2} (1 + \frac{n-2}{d(n+2)}) (\nabla_{\mathbf{x}} L_p(\mathbf{x}^t, \mathbf{y}^t, \{\lambda_i^t\})^\top \mathbf{H}_{\mathbf{x}}(\mathbf{x}^t, \mathbf{y}^t, \{\lambda_i^t\}) \nabla_{\mathbf{x}} L_p(\mathbf{x}^t, \mathbf{y}^t, \{\lambda_i^t\})) \\
&+ \frac{1}{B} \langle \Sigma_{\mathbf{x}}(\mathbf{x}^t, \mathbf{y}^t, \{\lambda_i^t\}), \mathbf{H}_{\mathbf{x}}(\mathbf{x}^t, \mathbf{y}^t, \{\lambda_i^t\}) \rangle.
\end{aligned} \tag{29}$$

Assumptions on smoothness and r-effective rank of the  $L_p$  function indicate that  $\|\mathbf{H}_{\mathbf{x}}(\mathbf{x}^t, \mathbf{y}^t, \{\lambda_i^t\})\|_{op} \leq L$  and  $\text{tr}(\mathbf{H}_{\mathbf{x}}(\mathbf{x}^t, \mathbf{y}^t, \{\lambda_i^t\})) \leq Lr$ . Thus, according to Eq.(29), we have

$$\begin{aligned}
& \mathbb{E}[L_p(\mathbf{x}^{t+1}, \mathbf{y}^t, \{\lambda_i^t\})] \\
&\leq L_p(\mathbf{x}^t, \mathbf{y}^t, \{\lambda_i^t\}) - \eta \|\nabla_{\mathbf{x}} L_p(\mathbf{x}^t, \mathbf{y}^t, \{\lambda_i^t\})\|^2 \\
&+ \frac{\eta^2 L}{2} (\frac{nr + n - 2}{d(n+2)} + 1) (\|\nabla_{\mathbf{x}} L_p(\mathbf{x}^t, \mathbf{y}^t, \{\lambda_i^t\})\|^2 + \frac{1}{B} \text{tr}(\Sigma_{\mathbf{x}}(\mathbf{x}^t, \mathbf{y}^t, \{\lambda_i^t\}))) \\
&= L_p(\mathbf{x}^t, \mathbf{y}^t, \{\lambda_i^t\}) - \eta \|\nabla_{\mathbf{x}} L_p(\mathbf{x}^t, \mathbf{y}^t, \{\lambda_i^t\})\|^2 + \frac{\eta^2 L}{2} (\frac{nr + n - 2}{d(n+2)} + 1) \mathbb{E}[\|\nabla_{\mathbf{x}} L_p(\mathbf{x}^t, \mathbf{y}^t, \{\lambda_i^t\}; \mathcal{B})\|^2].
\end{aligned} \tag{30}$$

It follows that

$$\begin{aligned}
& \mathbb{E}[L_p(\mathbf{x}^{t+1}, \mathbf{y}^t, \{\lambda_i^t\})] - L_p(\mathbf{x}^t, \mathbf{y}^t, \{\lambda_i^t\}) \\
&\leq -\eta \|\nabla_{\mathbf{x}} L_p(\mathbf{x}^t, \mathbf{y}^t, \{\lambda_i^t\})\|^2 + \frac{\eta^2 L \gamma}{2} \mathbb{E}[\|\nabla_{\mathbf{x}} L_p(\mathbf{x}^t, \mathbf{y}^t, \{\lambda_i^t\}; \mathcal{B})\|^2],
\end{aligned} \tag{31}$$

864 where  $\gamma = \Theta(r/d) > 1$ .

865 Similar to Eq.(31), according to the descent lemma for stochastic gradient descent (Malladi et al.,  
866 2023), we can obtain that

$$\begin{aligned} 867 & \mathbb{E}[L_p(\mathbf{x}^{t+1}, \mathbf{y}^{t+1}, \{\lambda_i^t\})] - L_p(\mathbf{x}^{t+1}, \mathbf{y}^t, \{\lambda_i^t\}) \\ 868 & \leq -\eta \|\nabla_{\mathbf{y}} L_p(\mathbf{x}^{t+1}, \mathbf{y}^t, \{\lambda_i^t\})\|^2 + \frac{\eta^2 L}{2} \mathbb{E}[\|\nabla_{\mathbf{y}} L_p(\mathbf{x}^{t+1}, \mathbf{y}^t, \{\lambda_i^t\}; \mathcal{B})\|^2] \\ 869 & \leq -\eta \|\nabla_{\mathbf{y}} L_p(\mathbf{x}^{t+1}, \mathbf{y}^t, \{\lambda_i^t\})\|^2 + \frac{\eta^2 L \gamma}{2} \mathbb{E}[\|\nabla_{\mathbf{y}} L_p(\mathbf{x}^{t+1}, \mathbf{y}^t, \{\lambda_i^t\}; \mathcal{B})\|^2], \end{aligned} \quad (32)$$

870 and

$$\begin{aligned} 871 & \mathbb{E}[L_p(\mathbf{x}^{t+1}, \mathbf{y}^{t+1}, \{\lambda_1^{t+1}, \lambda_2^t, \dots, \lambda_{i-1}^t, \lambda_i^t\})] - L_p(\mathbf{x}^{t+1}, \mathbf{y}^{t+1}, \{\lambda_1^t, \lambda_2^t, \dots, \lambda_{i-1}^t, \lambda_i^t\}) \\ 872 & \leq -\eta \|\nabla_{\lambda_1} L_p(\mathbf{x}^{t+1}, \mathbf{y}^{t+1}, \{\lambda_1^t, \lambda_2^t, \dots, \lambda_{i-1}^t, \lambda_i^t\})\|^2 \\ 873 & + \frac{\eta^2 L \gamma}{2} \mathbb{E}[\|\nabla_{\lambda_1} L_p(\mathbf{x}^{t+1}, \mathbf{y}^{t+1}, \{\lambda_1^t, \lambda_2^t, \dots, \lambda_{i-1}^t, \lambda_i^t\}; \mathcal{B})\|^2], \\ 874 & \mathbb{E}[L_p(\mathbf{x}^{t+1}, \mathbf{y}^{t+1}, \{\lambda_1^{t+1}, \lambda_2^{t+1}, \dots, \lambda_{i-1}^t, \lambda_i^t\})] - L_p(\mathbf{x}^{t+1}, \mathbf{y}^{t+1}, \{\lambda_1^{t+1}, \lambda_2^t, \dots, \lambda_{i-1}^t, \lambda_i^t\}) \\ 875 & \leq -\eta \|\nabla_{\lambda_2} L_p(\mathbf{x}^{t+1}, \mathbf{y}^{t+1}, \{\lambda_1^{t+1}, \lambda_2^t, \dots, \lambda_{i-1}^t, \lambda_i^t\})\|^2 \\ 876 & + \frac{\eta^2 L \gamma}{2} \mathbb{E}[\|\nabla_{\lambda_2} L_p(\mathbf{x}^{t+1}, \mathbf{y}^{t+1}, \{\lambda_1^{t+1}, \lambda_2^t, \dots, \lambda_{i-1}^t, \lambda_i^t\}; \mathcal{B})\|^2], \\ 877 & \dots \dots \dots \end{aligned} \quad (33)$$

$$\begin{aligned} 878 & \mathbb{E}[L_p(\mathbf{x}^{t+1}, \mathbf{y}^{t+1}, \{\lambda_1^{t+1}, \lambda_2^{t+1}, \dots, \lambda_{i-1}^{t+1}, \lambda_i^t\})] - L_p(\mathbf{x}^{t+1}, \mathbf{y}^{t+1}, \{\lambda_1^{t+1}, \lambda_2^{t+1}, \dots, \lambda_{i-1}^t, \lambda_i^t\}) \\ 879 & \leq -\eta \|\nabla_{\lambda_{i-1}} L_p(\mathbf{x}^{t+1}, \mathbf{y}^{t+1}, \{\lambda_1^{t+1}, \lambda_2^{t+1}, \dots, \lambda_{i-1}^t, \lambda_i^t\})\|^2 \\ 880 & + \frac{\eta^2 L \gamma}{2} \mathbb{E}[\|\nabla_{\lambda_{i-1}} L_p(\mathbf{x}^{t+1}, \mathbf{y}^{t+1}, \{\lambda_1^{t+1}, \lambda_2^{t+1}, \dots, \lambda_{i-1}^t, \lambda_i^t\}; \mathcal{B})\|^2], \\ 881 & \dots \dots \dots \end{aligned} \quad (34)$$

$$\begin{aligned} 882 & \mathbb{E}[L_p(\mathbf{x}^{t+1}, \mathbf{y}^{t+1}, \{\lambda_1^{t+1}, \lambda_2^{t+1}, \dots, \lambda_{i-1}^{t+1}, \lambda_i^{t+1}\})] - L_p(\mathbf{x}^{t+1}, \mathbf{y}^{t+1}, \{\lambda_1^{t+1}, \lambda_2^{t+1}, \dots, \lambda_{i-1}^{t+1}, \lambda_i^t\}) \\ 883 & \leq -\eta \|\nabla_{\lambda_i} L_p(\mathbf{x}^{t+1}, \mathbf{y}^{t+1}, \{\lambda_1^{t+1}, \lambda_2^{t+1}, \dots, \lambda_{i-1}^{t+1}, \lambda_i^t\})\|^2 \\ 884 & + \frac{\eta^2 L \gamma}{2} \mathbb{E}[\|\nabla_{\lambda_i} L_p(\mathbf{x}^{t+1}, \mathbf{y}^{t+1}, \{\lambda_1^{t+1}, \lambda_2^{t+1}, \dots, \lambda_{i-1}^{t+1}, \lambda_i^t\}; \mathcal{B})\|^2]. \\ 885 & \dots \dots \dots \end{aligned} \quad (35)$$

886 For  $\mathbf{x}$  variable, according to Eq.(31), denote the step size of the stochastic gradient descent version  
887 of our algorithm as  $\eta'$ , and set  $\eta = \frac{\eta'}{\gamma}$ , it follows that

$$\begin{aligned} 888 & \mathbb{E}[L_p(\mathbf{x}^{t+1}, \mathbf{y}^t, \{\lambda_i^t\})] - L_p(\mathbf{x}^t, \mathbf{y}^t, \{\lambda_i^t\}) \\ 889 & \leq \frac{1}{\gamma} [-\eta' \|\nabla_{\mathbf{x}} L_p(\mathbf{x}^t, \mathbf{y}^t, \{\lambda_i^t\})\|^2 + \frac{\eta'^2 L}{2} \mathbb{E}[\|\nabla_{\mathbf{x}} L_p(\mathbf{x}^t, \mathbf{y}^t, \{\lambda_i^t\}; \mathcal{B})\|^2]]. \end{aligned} \quad (36)$$

890 Then, set  $\eta' \leq \frac{1}{L}$  to have

$$\begin{aligned} 891 & \mathbb{E}[L_p(\mathbf{x}^{t+1}, \mathbf{y}^t, \{\lambda_i^t\})] - L_p(\mathbf{x}^t, \mathbf{y}^t, \{\lambda_i^t\}) \\ 892 & \leq \frac{1}{\gamma} [-\frac{\eta'}{2} \|\nabla_{\mathbf{x}} L_p(\mathbf{x}^t, \mathbf{y}^t, \{\lambda_i^t\})\|^2 + \frac{\eta'^2 L}{2B} \text{tr}(\Sigma_{\mathbf{x}}(\mathbf{x}^t, \mathbf{y}^t, \{\lambda_i^t\}))]. \end{aligned} \quad (37)$$

893 For any  $\mathbf{w}$  in  $(\mathbf{x}, \mathbf{y}, \{\lambda_i\})$ , following (Malladi et al., 2023), we assume that there exist  $\alpha$  such that  
894  $\text{tr}(\Sigma_{\mathbf{w}}(\mathbf{x}, \mathbf{y}, \{\lambda_i\})) \leq \alpha(L_p(\mathbf{x}, \mathbf{y}, \{\lambda_i\}) - L_p^*)$ . Then we have

$$\begin{aligned} 895 & \mathbb{E}[L_p(\mathbf{x}^{t+1}, \mathbf{y}^t, \{\lambda_i^t\})] - L_p(\mathbf{x}^t, \mathbf{y}^t, \{\lambda_i^t\}) \\ 896 & \leq \frac{1}{\gamma} (-\eta' \mu + \frac{\eta'^2 L \alpha}{2B}) (\mathbb{E}[L_p(\mathbf{x}^t, \mathbf{y}^t, \{\lambda_i^t\})] - L_p^*) \\ 897 & \Rightarrow \mathbb{E}[L_p(\mathbf{x}^{t+1}, \mathbf{y}^t, \{\lambda_i^t\})] - L_p^* \leq (1 - \frac{1}{\gamma} (\eta' \mu - \frac{\eta'^2 L \alpha}{2B})) (\mathbb{E}[L_p(\mathbf{x}^t, \mathbf{y}^t, \{\lambda_i^t\})] - L_p^*). \end{aligned} \quad (38)$$

Set  $\eta' = \min\{\frac{1}{L}, \frac{\mu B}{L\alpha}\}$  to have

$$\mathbb{E}[L_p(\mathbf{x}^{t+1}, \mathbf{y}^t, \{\lambda_l^t\})] - L_p^* \leq \rho(\mathbb{E}[L_p(\mathbf{x}^t, \mathbf{y}^t, \{\lambda_l^t\})] - L_p^*), \quad (40)$$

where  $\rho = (1 - \frac{1}{\gamma}(\min\{\frac{\mu}{2L}, \frac{\mu^2 B}{2L\alpha}\}))$ .

Similar to  $\mathbf{x}$  variable, by analyzing  $\mathbf{y}$  and  $\{\lambda_l\}$  variables in the same way as Eq.(37), Eq.(38), Eq.(39), and Eq.(40), we can obtain that

$$\begin{aligned} \mathbb{E}[L_p(\mathbf{x}^{t+1}, \mathbf{y}^{t+1}, \{\lambda_l^t\})] - L_p^* &\leq \rho(\mathbb{E}[L_p(\mathbf{x}^{t+1}, \mathbf{y}^t, \{\lambda_l^t\})] - L_p^*), \\ \mathbb{E}[L_p(\mathbf{x}^{t+1}, \mathbf{y}^{t+1}, \{\lambda_1^{t+1}, \lambda_2^t, \dots, \lambda_{l-1}^t, \lambda_l^t\})] - L_p^* &\leq \rho(\mathbb{E}[L_p(\mathbf{x}^{t+1}, \mathbf{y}^{t+1}, \{\lambda_1^t, \lambda_2^t, \dots, \lambda_{l-1}^t, \lambda_l^t\})] - L_p^*), \\ \mathbb{E}[L_p(\mathbf{x}^{t+1}, \mathbf{y}^{t+1}, \{\lambda_1^{t+1}, \lambda_2^{t+1}, \dots, \lambda_{l-1}^t, \lambda_l^t\})] - L_p^* &\leq \rho(\mathbb{E}[L_p(\mathbf{x}^{t+1}, \mathbf{y}^{t+1}, \{\lambda_1^{t+1}, \lambda_2^t, \dots, \lambda_{l-1}^t, \lambda_l^t\})] - L_p^*), \\ &\dots\dots \\ \mathbb{E}[L_p(\mathbf{x}^{t+1}, \mathbf{y}^{t+1}, \{\lambda_1^{t+1}, \lambda_2^{t+1}, \dots, \lambda_{l-1}^{t+1}, \lambda_l^t\})] - L_p^* &\leq \rho(\mathbb{E}[L_p(\mathbf{x}^{t+1}, \mathbf{y}^{t+1}, \{\lambda_1^{t+1}, \lambda_2^{t+1}, \dots, \lambda_{l-1}^t, \lambda_l^t\})] - L_p^*), \\ \mathbb{E}[L_p(\mathbf{x}^{t+1}, \mathbf{y}^{t+1}, \{\lambda_1^{t+1}, \lambda_2^{t+1}, \dots, \lambda_{l-1}^{t+1}, \lambda_l^{t+1}\})] - L_p^* &\leq \rho(\mathbb{E}[L_p(\mathbf{x}^{t+1}, \mathbf{y}^{t+1}, \{\lambda_1^{t+1}, \lambda_2^{t+1}, \dots, \lambda_{l-1}^{t+1}, \lambda_l^t\})] - L_p^*). \end{aligned} \quad (41)$$

Combining Eq.(40) and Eq.(41), in the  $t + 1$  iteration we have

$$\mathbb{E}[L_p(\mathbf{x}^{t+1}, \mathbf{y}^{t+1}, \{\lambda_l^{t+1}\})] - L_p^* \leq \rho^{p+2}(\mathbb{E}[L_p(\mathbf{x}^t, \mathbf{y}^t, \{\lambda_l^t\})] - L_p^*). \quad (42)$$

Denoting  $\rho^{p+2}$  as  $\rho'$  and according to Eq.(42), we can obtain that

$$\mathbb{E}[L_p(\mathbf{x}^t, \mathbf{y}^t, \{\lambda_l^t\})] - L_p^* \leq \rho'^t(\mathbb{E}[L_p(\mathbf{x}^0, \mathbf{y}^0, \{\lambda_l^0\})] - L_p^*). \quad (43)$$

We can therefore obtain a solution with  $\mathbb{E}[L_p(\mathbf{x}^t, \mathbf{y}^t, \{\lambda_l^t\})] - L_p^* \leq \epsilon$  after

$$\begin{aligned} t &= \frac{\gamma}{p+2} \max\left(\frac{2L}{\mu}, \frac{2L\alpha}{\mu^2 B}\right) \log\left(\frac{L_p(\mathbf{x}^0, \mathbf{y}^0, \{\lambda_l^0\}) - L_p^*}{\epsilon}\right) \\ &= \mathcal{O}\left(\left(\frac{r}{d} + 1\right)\left(\frac{1}{p}\right)\left(\frac{L}{\mu} + \frac{L\alpha}{\mu^2 B}\right) \log\left(\frac{L_p(\mathbf{x}^0, \mathbf{y}^0, \{\lambda_l^0\}) - L_p^*}{\epsilon}\right)\right). \end{aligned} \quad (44)$$

□

## A.2 DETAILED EXPERIMENTAL SETTINGS

### A.2.1 NATURAL LANGUAGE UNDERSTANDING TASKS

**Datasets.** For the text classification task, we use the following datasets: 1) SST-2 (The Stanford Sentiment Treebank) (Socher et al., 2013) is used to predict the sentiment of a given sentence in the movie reviews domain. 2) MRPC (The Microsoft Research Paraphrase Corpus) (Dolan & Brockett, 2005) contains pairs of SENTENCE with manual annotations indicating whether the SENTENCE in each pair are semantically equivalent. 3) Tweets.Hate\_speech\_detection (Lhoest et al., 2021) aims to detect hate speech in tweets. We will abbreviate this dataset as ‘‘Tweets\_Hate’’. 4) Wiki.Toxic dataset comprises comments gathered from Wikipedia forums, categorized into two groups: toxic and non-toxic. 5) FELM (Factuality Evaluation of large Language Models) (Chen et al., 2023b) aims to check whether the answer is correct for a question. 6) BoolQ (Wang et al., 2019) is a question answering dataset for yes/no questions. 7) WiC (Wang et al., 2019) is a dataset for word sense disambiguation. Note that the Tweets.Hate and Wiki.Toxic datasets may contain potentially harmful text.

For the multiple choice task, we use COPA (Wang et al., 2019) and SWAG (Zellers et al., 2018) dataset. COPA (The Choice Of Plausible Alternatives) is designed to evaluate open-domain commonsense causal reasoning questions. SWAG (Situations With Adversarial Generations) is a large scale dataset for natural language inference and commonsense reasoning. Finally, for the single-turn question answering task, SQuAD (Rajpurkar et al., 2016) and DROP (Dua et al., 2019) are used. SQuAD (Stanford Question Answering Dataset) (Rajpurkar et al., 2016) is a reading comprehension dataset with questions based on Wikipedia articles. DROP (Discrete Reasoning Over Paragraphs) is a comprehension benchmark requiring discrete reasoning over paragraphs.

Table 7: Prompt Templates for The Cloud-hosted LLM on NLU Tasks.

| Dataset     | Templates for the cloud-hosted LLM                                                                                                                                                                                                                                                                                         |
|-------------|----------------------------------------------------------------------------------------------------------------------------------------------------------------------------------------------------------------------------------------------------------------------------------------------------------------------------|
| SST-2       | How is the sentiment of sentence: [OPTIMIZED_INFO]? First respond ONLY with “Great” or “Terrible”, then give some explanation.                                                                                                                                                                                             |
| MRPC        | Whether [SENTENCE1] and [SENTENCE2] in the pair are semantically equivalent? Note: [OPTIMIZED_INFO]. First respond ONLY with “Yes” or “No”, then give some explanation.                                                                                                                                                    |
| Tweets.Hate | Whether [OPTIMIZED_INFO] has a racist or sexist sentiment associated with it? First respond ONLY with “Yes” or “No”, then give some explanation.                                                                                                                                                                           |
| Wiki.Toxic  | Whether the comment gathered from Wikipedia forums [OPTIMIZED_INFO] is toxic. First respond ONLY with “Yes” or “No”, then give some explanation.                                                                                                                                                                           |
| FELM        | For [QUESTION], whether [ANSWER] is a correct answer? Note: [OPTIMIZED_INFO]. First respond ONLY with “Yes” or “No”, then give some explanation.                                                                                                                                                                           |
| BoolQ       | Please answer the [QUESTION] based on the [PASSAGE]. Note: [OPTIMIZED_INFO]. First respond ONLY with “Yes” or “No”, then give some explanation.                                                                                                                                                                            |
| WiC         | Determine whether the intended sense of the [TEXT] is the same in [SENTENCE1] and [SENTENCE2]. Note: [OPTIMIZED_INFO]. First respond ONLY with “Yes” or “No”, then give some explanation.                                                                                                                                  |
| COPA        | Choose one from the following two SENTENCE and deduce which sentence is the [QUESTION] of [PREMISE]. Option one: [SENTENCE1]; Option two: [SENTENCE2]. Note: [OPTIMIZED_INFO]. First respond ONLY with “One” or “Two”, then give some explanation.                                                                         |
| SWAG        | Choose one from the following four SENTENCE to deduce which sentence might be the end of [SENTENCE0]. Option one: [SENTENCE1]; Option two:[SENTENCE2]; Option three:[SENTENCE3]; Option four: [SENTENCE4]. Note: [OPTIMIZED_INFO]. First respond ONLY with “One” or “Two”, “Three”, or “Four”, then give some explanation. |
| SQuAD/DROP  | Please answer the QUESTION and give some explanation. Context Info: [OPTIMIZED_INFO]. Your response should follow the following format: “Answer: ...; Explanation: ...”.                                                                                                                                                   |

**Prompt Templates.** The prompt templates for the cloud-hosted LLM are summarized in Table 7, where “OPTIMIZED\_INFO” denotes the prompts optimized by the edge agent.

**Baselines.** We compare the proposed framework, sandwiched tuning, with the following baselines. 1) Manual Prompt uses the manual designed prompt templates similar to Table 7, but without the OPTIMIZED\_INFO. 2) Zero-shot CoT (Kojima et al., 2022) adds a hint, “Let’s think step-by-step”, on the basis of manual prompt. 3) Random In-Context Learning (ICL) provides a few randomly selected example inputs and their corresponding outputs to guide the model in understanding the context and the type of response. 4) OPRO (Yang et al., 2023) uses an LLM to generate and evaluate new solutions based on the prompt step-by-step.

**Implementation details.** For the edge agent, we employ the low-rank adaptation (LoRA) method for the parameter-efficient fine-tuning of the edge LLM while performing a full-parameter fine-tuning of the adapter model. We use AdamW as the optimizer and set  $\eta = 0.0001$ . For each dataset,

1026 we use 500 training samples and 50 testing samples. We repeat the experiment on each dataset 5  
1027 times and record the average performance.

### 1029 A.2.2 MULTI-TURNS DIALOGUE GENERATION

1030 **Datasets.** For datasets, we utilize six customer support datasets, each derived from Twitter interac-  
1031 tions, including Hulu\_Support, Sainsburys, Comcastcares, Sprintcare, UPSHelp and XboxSupport.  
1032 Each dataset contains multi-turn dialogues where customers reach out to companies with issues or  
1033 questions, and support agents respond with resolutions or further queries. These datasets provide  
1034 a comprehensive view of typical customer support scenarios, covering a range of industries such  
1035 as entertainment, retail, telecommunications, logistics, and gaming. This variety allows for an in-  
1036 depth analysis of conversational patterns and the effectiveness of support responses across different  
1037 sectors.

1038 **Baselines.** For baselines, we compare 2 different strategies for selecting in-context examples:

- 1039 • Random: Randomly selects dialogue samples without specific optimization.
- 1040 • ICL: Retrieves 5 dialogues and randomly selects 2 from them for generation.

1041 **Metrics.** For evaluation metrics, we use the “Win Rate” metric, as described by Dubois et al.  
1042 (2024). The “Win Rate” metric measures how often a dialogue generation method outperforms  
1043 another in producing higher-quality conversations. In the evaluation process, qwen-max compares  
1044 two generated dialogues and determines which one is closer to the ground truth. Essentially, it  
1045 reflects the percentage of times one method’s output is judged to be superior to another’s in terms of  
1046 dialogue quality. In our experiments, we use qwen-max’s output without any context samples as the  
1047 competitor.

### 1051 A.2.3 TOOL USE TASKS

1052 **Datasets.** For datasets, We use a publicly available mathematical word problem dataset for the  
1053 mathematical reasoning task(Zhao et al., 2020). Additionally, we created three specialized datasets  
1054 for floating-point arithmetic, floating-point comparison, and character counting, as shown in Table  
1055 8.

1056 To assess the model’s performance in floating-point calculation scenarios, we developed the “Float-  
1057 Arithmetic” dataset, which features real-world problems such as shopping, weighing, and financial  
1058 calculations. This dataset consists of 500 entries generated by GPT-4o, which were manually verified  
1059 for accuracy and further calibrated using ChatGLM4 to ensure the reliability of results.

1060 For the floating point comparison task, we built a dataset named Float-Comparison , addressing  
1061 discrepancies observed in LLM’s calculations compared to calculator ground truths. Using LLM  
1062 (qwen-max), we generated a set of comparison questions based on these results. In the Character  
1063 Counting task, we created the “Character-Counting” dataset, where the goal is to count occurrences  
1064 of a specific character in a string, using LLM-generated templates.

1065 **Prompt Templates.** The prompt templates for the cloud-hosted LLM are summarized in Table 10,  
1066 where “OPTIMIZED\_INFO” denotes the prompts optimized by the edge agent. The origin INFO is  
1067 shown in Table 9.

1068 **Implementation Details.** For the edge agent, we utilize the low-rank adaptation (LoRA) method  
1069 to perform parameter-efficient fine-tuning on the edge LLM, while applying full-parameter fine-  
1070 tuning on the adapter model. We use AdamW as the optimizer with a learning rate of  $\eta = 0.0001$ .  
1071 For APE-210K dataset, we random select 1000 training samples and 200 testing samples. For an-  
1072 other three datasets, each contains 400 training samples and 100 testing samples. We conduct the  
1073 experiments five times for each dataset and report the average performance results.

1074 **Experiment on tradeoffs among cloud-edge load distribution, inference latency, and inference  
1075 accuracy.** To demonstrate the system’s flexibility in balancing real-time performance and accu-  
1076 racy, we include an additional experiment that dynamically distributes loads between the cloud and  
1077

1080  
 1081  
 1082  
 1083  
 1084  
 1085  
 1086  
 1087  
 1088  
 1089  
 1090  
 1091  
 1092  
 1093  
 1094  
 1095  
 1096  
 1097  
 1098  
 1099  
 1100  
 1101  
 1102  
 1103  
 1104  
 1105  
 1106  
 1107  
 1108  
 1109  
 1110  
 1111  
 1112  
 1113  
 1114  
 1115  
 1116  
 1117  
 1118  
 1119  
 1120  
 1121  
 1122  
 1123  
 1124  
 1125  
 1126  
 1127  
 1128  
 1129  
 1130  
 1131  
 1132  
 1133

Table 8: Dataset Examples.

| Dataset            | Question Example                                                                                                                                                                                                                                                                                                                                                                                                                                                                                                   | Answer Example |
|--------------------|--------------------------------------------------------------------------------------------------------------------------------------------------------------------------------------------------------------------------------------------------------------------------------------------------------------------------------------------------------------------------------------------------------------------------------------------------------------------------------------------------------------------|----------------|
| Float-Arithmetic   | A car rental company charges a daily fee of 45.50 and an additional charge of 0.25 per mile driven. If a customer rents a car for 3 days and drives 150 miles, how much will the total cost be?                                                                                                                                                                                                                                                                                                                    | 174.0          |
| Float-Arithmetic   | A car rental company charges a base fee of 35 per day, with an additional cost of 0.15 per mile driven. If a customer rents a car for 3 days and drives it for 120 miles, how much does the total cost for the rental come to?                                                                                                                                                                                                                                                                                     | 123.0          |
| Float-Arithmetic   | You are planning a road trip across three states, and you need to calculate the total cost of fuel. You know the following information: - Your car’s average fuel efficiency is 25.7 miles per gallon. - The total distance of the trip is 1,345.6 miles. - Fuel prices vary by state: \$3.89 per gallon in the first state for 400 miles, \$4.15 per gallon in the second state for 600 miles, and \$3.95 per gallon in the third state for the remaining distance. What is the total cost of fuel for your trip? | 210.55         |
| Float-Comparison   | Does 58.4 or 58.10 have the upper hand in value?                                                                                                                                                                                                                                                                                                                                                                                                                                                                   | 58.4           |
| Float-Comparison   | Between 49.7 and 49.30, which value is greater?                                                                                                                                                                                                                                                                                                                                                                                                                                                                    | 49.7           |
| Character-Counting | how many ‘i’ in word ‘kiwifruit’?                                                                                                                                                                                                                                                                                                                                                                                                                                                                                  | 3              |

Table 9: Prompt Templates for the Edge Agent on Tool Use.

| Dataset            | Templates for the Edge Agent                                                                                                                                                                                                                                                                                                   |
|--------------------|--------------------------------------------------------------------------------------------------------------------------------------------------------------------------------------------------------------------------------------------------------------------------------------------------------------------------------|
| APE-210K           | Note: In a conversational context, when calculations are required, express the entire calculation using a single formula: 'Calculate(expression)'. For example, for $9.10 * 2.5 + 1.23 - 9.8$ , output: 'Calculate( $9.10 * 2.5 + 1.23 - 9.8$ )'. The 'Calculate(expression)' should encompass the entire calculation process. |
| Float-Arithmetic   | Note: In a conversational context, when calculations are required, express the entire calculation using a single formula: 'Calculate(expression)'. For example, for $9.10 * 2.5 + 1.23 - 9.8$ , output: 'Calculate( $9.10 * 2.5 + 1.23 - 9.8$ )'. The 'Calculate(expression)' should encompass the entire calculation process. |
| Float-Comparison   | Rephrase the task as a direct comparison. For example, convert into a sentence like "You need to compare A and B", where A and B are the two numbers to be compared.                                                                                                                                                           |
| Character-Counting | Let us think step by step.                                                                                                                                                                                                                                                                                                     |

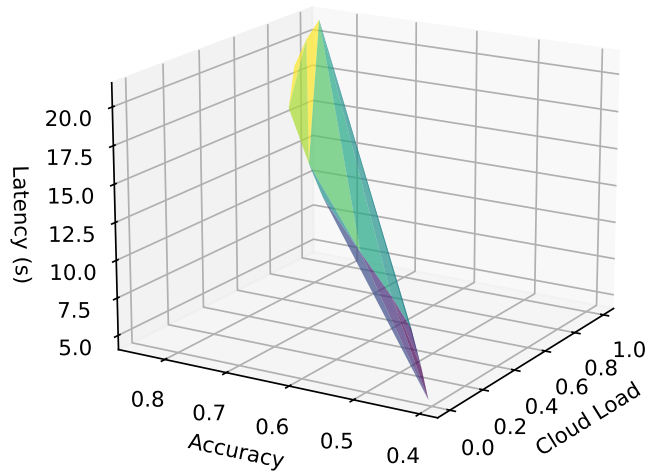

Figure 2: Impact of Cloud-Edge Load Distribution on System Latency and Accuracy.

edge based on query complexity. Specifically, we simulate the cloud-hosted LLM’s load using a dataset comprising both complex and simple queries. The complex queries are routed to the cloud-hosted LLM, while the simpler ones are handled by the edge LLM agent. The cloud load in this experiment refers to the proportion of queries assigned to the cloud-hosted LLM.



Table 10: Prompt Templates for the Cloud-hosted LLM on Tool Use.

| Dataset            | Templates for the Cloud-Hosted LLM                                                                           |
|--------------------|--------------------------------------------------------------------------------------------------------------|
| APE-210K           | Given the math problem:[QUESTION], Note:[OPTIMIZED INFO]. For all other content, respond normally.           |
| Float-Arithmetic   | Given the math problem:[QUESTION], Note:[OPTIMIZED INFO]. For all other content, respond normally.           |
| Float-Comparison   | Given the question:[QUESTION]. Info: [OPTIMIZED INFO]. Response should follow the format: "Answer[sentence]" |
| Character-Counting | Given the question:[QUESTION]. Info: [OPTIMIZED INFO]. Response should follow the format: "Answer[sentence]" |

We analyze the system’s overall latency and accuracy under different load distributions. As shown in Figure 2, there is a positive correlation between the load assigned to the cloud-hosted LLM and both latency and accuracy. Notably, reducing the cloud-side load significantly decreases the latency, while the accuracy remains relatively unaffected. This suggests that the edge LLM agent can effectively handle less complex queries, allowing for efficient load balancing between the cloud and edge components.

#### A.2.4 LLM TASK DECOMPOSITION

**Datasets.** For the LLM task decomposition task, we use the following datasets: 1) Orca-Math 200K contains approximately 200K grade school math word problems.(Mitra et al., 2024) 2) TaskLAMA (Task Language Model Analysis) is used for testing various task decomposition and measuring the performance (Yuan et al., 2024).

**Prompt Templates.** The prompt templates for the cloud-hosted LLM and edge agents are summarized in Table 12, 13 where “OPTIMIZED.INFO” denotes the prompts optimized by the edge agent.

**Baselines.** We used three large language models with different parameter sizes, namely GPT2, qwen2-7B, and llama3-8B, and compared the task performance before and after optimization.

**Implementation details.** For evaluation metrics, we use F1 score and cosine similarity, as described by (Yuan et al., 2024). F1 score reflects the likelihood that the model can correctly perform task decomposition and cosine similarity assesses the similarity between the task decomposition results of the edge agent and those of the cloud-hosted LLM. In the evaluation process, for the same complex task, both the cloud-hosted LLM and the edge agent perform a task decomposition. The performance of the edge agent’s task decomposition is then evaluated based on the results from the cloud-hosted LLM, generating result of cosine similarity and F1 score. Based on these evaluation results, the edge agent is optimized.

Table 11: Prompt Templates for Edge Agent on Tool Use.

| Dataset                       | Templates for Edge Agent                                                                                                                                                                                                                                                                                                                                                                                                                                                                                                                                                                                                                                                                                                                                                                                                                                                                        |
|-------------------------------|-------------------------------------------------------------------------------------------------------------------------------------------------------------------------------------------------------------------------------------------------------------------------------------------------------------------------------------------------------------------------------------------------------------------------------------------------------------------------------------------------------------------------------------------------------------------------------------------------------------------------------------------------------------------------------------------------------------------------------------------------------------------------------------------------------------------------------------------------------------------------------------------------|
| APE-210K and Float-Arithmetic | Your task is to extract a text call to the calculator API, with the output format being 'Calculate(expression)', where "expression" is used for expressions involving +, -, *, and / operators. Only return calls for the specified methods Here are some examples of API calls: Input: To find the area of the tabletop with a cutout, subtract the cutout's area (length x width) from the full tabletop area (length x width). Calculate(2.75 * 1.5 - 0.5 * 0.3) Output: Calculate(2.75 * 1.5 - 0.5 * 0.3) Input: To determine the total cost of the rental, we need to calculate the cost of the miles driven and add it to the base fee. The formula for the total cost is: Total Cost=120+(0.25×150.5), Now, let's express this calculation using the requested format: Calculate(120 + (0.25 * 150.5)) Output: Calculate(120 + (0.25 * 150.5)) Input: [QUESTION] Output:.                |
| Float-Comparison              | Your task is to add calls to a API named "Compare" to a piece of text. The calls should help you compare two numbers to determine which one is larger. You can call the API by writing "[Compare(number1,number2)]" where number1 and number2 are two numbers needed to be compared.<br>Examples: - Input: Which is larger, 56.1 or 56.13? Output: Answer:[Compare(56.1, 56.13)]<br>- Input: Between 993.32 and 993.9, which has the numerical advantage?. Output: Answer:[Compare(999.32, 993.9)]<br>- Input: Determine the larger number between 78.9 and 78.91. Output: Answer:[Compare(78.9, 78.91)]<br>- Input: You need to compare 88.11 and 88.3 to determine which one is larger. Output: Answer:[Compare(88.11, 88.3)]<br>Task: Given the following question, add the 'Compare' calling text and format the output as specified like Answer:[Compare(A,B)].<br>Input: question Output: |
| Character-Counting            | Your task is to add calls to a API named "Count" to a piece of text. The calls should help you count how many chars in a word. You can call the API by writing "[Count(word,char)]",.<br>Examples: - Input: how many 'r' in word 'kiwifruit'? Output: Answer:[Count(kiwifruit,r)]<br>- Input: how many 'a' in word 'apricot'? Output: Answer:[Count(apricot,a)]<br>- Input: how many 'b' in word 'broccoli'? Output: Answer:[Count(broccoli,b)]<br>Task: Given the following question, add the 'Count' calling text and format the output as specified like Answer:[Count(A,B)].<br>Input: question Output:                                                                                                                                                                                                                                                                                     |

1296 Table 12: Prompt Templates for the Cloud-hosted LLM on LLM Task Decomposition.

| 1297 | 1298           | 1299                                                      |
|------|----------------|-----------------------------------------------------------|
| 1300 | <b>Dataset</b> | <b>Templates for the cloud-hosted LLM</b>                 |
| 1301 | Orca-Math 200K | given the math problem:[QUESTION]. Decompose the problem. |
| 1302 | TaskLAMA       | given the problem:[QUESTION]. Decompose the problem.      |

1303  
1304 Table 13: Prompt Templates for Edge Agent on LLM Task Decomposition.

| 1305 | 1306           | 1307                                                                                |
|------|----------------|-------------------------------------------------------------------------------------|
| 1308 | <b>Dataset</b> | <b>Templates for edge agent</b>                                                     |
| 1309 | Orca-Math 200K | given the math problem:[QUESTION], Note:[OPTIMIZED INFO].<br>Decompose the problem. |
| 1310 | TaskLAMA       | given the problem:[QUESTION], Note:[OPTIMIZED INFO]. De-<br>compose the problem.    |

1312  
1313  
1314  
1315  
1316  
1317  
1318  
1319  
1320  
1321  
1322  
1323  
1324  
1325  
1326  
1327  
1328  
1329  
1330  
1331  
1332  
1333  
1334  
1335  
1336  
1337  
1338  
1339  
1340  
1341  
1342  
1343  
1344  
1345  
1346  
1347  
1348  
1349
